# Supplementary material for: SeqTailor: a user-friendly webserver for the extraction of DNA or protein sequences from next-generation sequencing data
Source: PubMed Central journal article supplement — Nucleic Acids Res. 2019 May 2;47(W1):W623–31. doi: 10.1093/nar/gkz326 (PMC6602489; doi:10.1093/nar/gkz326), 2019-05-02
Supplement: gkz326_supplemental_file.pdf [file gkz326_supplemental_file.pdf]

# Supplementary Material

## SeqTailor: a user-friendly webserver for the extraction of DNA or protein sequences from next-generation sequencing data

Peng Zhang, Bertrand Boisson, Peter D. Stenson, David N. Cooper,  
Jean-Laurent Casanova, Laurent Abel, and Yuval Itan

### Table of Contents

|                                                                       |    |
|-----------------------------------------------------------------------|----|
| Supplementary Tables and Figures.....                                 | 1  |
| Case Study.....                                                       | 9  |
| Case Study 1: DNA sequence extraction for a variant in MSH2.....      | 9  |
| Case Study 2: DNA sequence extraction for a variant in BRCA2 .....    | 11 |
| Case Study 3: DNA sequence extraction for a variant in IL2RG.....     | 13 |
| Case Study 4: Protein sequence extraction for a variant in BRAF.....  | 15 |
| Case Study 5: Protein sequence extraction for a variant in GJB2 ..... | 18 |
| References .....                                                      | 20 |

## Supplementary Tables and Figures

|                            |                       |                                         |
|----------------------------|-----------------------|-----------------------------------------|
| CHR_HSCHR1_1_C TG11        | CHR_HSCHR13_1_C TG4   | CHR_HSCHR18_2_C TG2                     |
| CHR_HSCHR1_1_C TG3         | CHR_HSCHR13_1_C TG5   | CHR_HSCHR18_2_C TG2_1                   |
| CHR_HSCHR1_1_C TG31        | CHR_HSCHR13_1_C TG6   | CHR_HSCHR18_3_C TG2_1                   |
| CHR_HSCHR1_1_C TG32_1      | CHR_HSCHR13_1_C TG7   | CHR_HSCHR18_4_C TG1_1                   |
| CHR_HSCHR1_2_C TG3         | CHR_HSCHR13_1_C TG8   | CHR_HSCHR18_5_C TG1_1                   |
| CHR_HSCHR1_2_C TG31        | CHR_HSCHR14_1_C TG1   | CHR_HSCHR18_ALT2_C TG2_1                |
| CHR_HSCHR1_2_C TG32_1      | CHR_HSCHR14_2_C TG1   | CHR_HSCHR18_ALT21_C TG2_1               |
| CHR_HSCHR1_3_C TG3         | CHR_HSCHR14_3_C TG1   | CHR_HSCHR19_1_C TG2                     |
| CHR_HSCHR1_3_C TG31        | CHR_HSCHR14_7_C TG1   | CHR_HSCHR19_1_C TG3_1                   |
| CHR_HSCHR1_3_C TG32_1      | CHR_HSCHR14_8_C TG1   | CHR_HSCHR19_2_C TG2                     |
| CHR_HSCHR1_4_C TG3         | CHR_HSCHR15_1_C TG1   | CHR_HSCHR19_2_C TG3_1                   |
| CHR_HSCHR1_4_C TG31        | CHR_HSCHR15_1_C TG3   | CHR_HSCHR19_3_C TG2                     |
| CHR_HSCHR1_4_C TG32_1      | CHR_HSCHR15_1_C TG8   | CHR_HSCHR19_3_C TG3_1                   |
| CHR_HSCHR1_5_C TG3         | CHR_HSCHR15_2_C TG3   | CHR_HSCHR19_4_C TG2                     |
| CHR_HSCHR1_5_C TG32_1      | CHR_HSCHR15_2_C TG8   | CHR_HSCHR19_4_C TG3_1                   |
| CHR_HSCHR1_6_C TG3         | CHR_HSCHR15_3_C TG3   | CHR_HSCHR19_5_C TG2                     |
| CHR_HSCHR1_8_C TG3         | CHR_HSCHR15_3_C TG8   | CHR_HSCHR19KIR_0010-5217-AB_C TG3_1     |
| CHR_HSCHR1_9_C TG3         | CHR_HSCHR15_4_C TG8   | CHR_HSCHR19KIR_0019-4656-A_C TG3_1      |
| CHR_HSCHR1_ALT2_1_C TG32_1 | CHR_HSCHR15_5_C TG8   | CHR_HSCHR19KIR_0019-4656-B_C TG3_1      |
| CHR_HSCHR10_1_C TG1        | CHR_HSCHR15_6_C TG8   | CHR_HSCHR19KIR_502960008-1_C TG3_1      |
| CHR_HSCHR10_1_C TG2        | CHR_HSCHR16_1_C TG1   | CHR_HSCHR19KIR_502960008-2_C TG3_1      |
| CHR_HSCHR10_1_C TG3        | CHR_HSCHR16_1_C TG3_1 | CHR_HSCHR19KIR_7191059-1_C TG3_1        |
| CHR_HSCHR10_1_C TG4        | CHR_HSCHR16_2_C TG3_1 | CHR_HSCHR19KIR_7191059-2_C TG3_1        |
| CHR_HSCHR10_1_C TG6        | CHR_HSCHR16_3_C TG1   | CHR_HSCHR19KIR_ABC08_A1_HAP_C TG3_1     |
| CHR_HSCHR11_1_C TG1_1      | CHR_HSCHR16_3_C TG3_1 | CHR_HSCHR19KIR_ABC08_AB_HAP_C_P_C TG3_1 |
| CHR_HSCHR11_1_C TG1_2      | CHR_HSCHR16_4_C TG1   | CHR_HSCHR19KIR_ABC08_AB_HAP_T_P_C TG3_1 |
| CHR_HSCHR11_1_C TG2        | CHR_HSCHR16_4_C TG3_1 | CHR_HSCHR19KIR_CA01-TA01_1_C TG3_1      |
| CHR_HSCHR11_1_C TG3        | CHR_HSCHR16_5_C TG1   | CHR_HSCHR19KIR_CA01-TA01_2_C TG3_1      |
| CHR_HSCHR11_1_C TG3_1      | CHR_HSCHR16_5_C TG3_1 | CHR_HSCHR19KIR_CA01-TB01_C TG3_1        |
| CHR_HSCHR11_1_C TG5        | CHR_HSCHR16_C TG2     | CHR_HSCHR19KIR_CA01-TB04_C TG3_1        |
| CHR_HSCHR11_1_C TG6        | CHR_HSCHR17_1_C TG1   | CHR_HSCHR19KIR_CA04_C TG3_1             |
| CHR_HSCHR11_1_C TG7        | CHR_HSCHR17_1_C TG2   | CHR_HSCHR19KIR_FH05_A_HAP_C TG3_1       |
| CHR_HSCHR11_1_C TG8        | CHR_HSCHR17_1_C TG4   | CHR_HSCHR19KIR_FH05_B_HAP_C TG3_1       |
| CHR_HSCHR11_2_C TG1        | CHR_HSCHR17_1_C TG5   | CHR_HSCHR19KIR_FH06_A_HAP_C TG3_1       |
| CHR_HSCHR11_2_C TG1_1      | CHR_HSCHR17_1_C TG9   | CHR_HSCHR19KIR_FH06_BA1_HAP_C TG3_1     |
| CHR_HSCHR11_2_C TG8        | CHR_HSCHR17_10_C TG4  | CHR_HSCHR19KIR_FH08_A_HAP_C TG3_1       |
| CHR_HSCHR11_3_C TG1        | CHR_HSCHR17_11_C TG4  | CHR_HSCHR19KIR_FH08_BAX_HAP_C TG3_1     |
| CHR_HSCHR12_1_C TG1        | CHR_HSCHR17_12_C TG4  | CHR_HSCHR19KIR_FH13_A_HAP_C TG3_1       |
| CHR_HSCHR12_1_C TG2        | CHR_HSCHR17_2_C TG1   | CHR_HSCHR19KIR_FH13_BA2_HAP_C TG3_1     |
| CHR_HSCHR12_1_C TG2_1      | CHR_HSCHR17_2_C TG2   | CHR_HSCHR19KIR_FH15_A_HAP_C TG3_1       |
| CHR_HSCHR12_2_C TG1        | CHR_HSCHR17_2_C TG4   | CHR_HSCHR19KIR_FH15_B_HAP_C TG3_1       |
| CHR_HSCHR12_2_C TG2        | CHR_HSCHR17_2_C TG5   | CHR_HSCHR19KIR_G085_A_HAP_C TG3_1       |
| CHR_HSCHR12_2_C TG2_1      | CHR_HSCHR17_3_C TG1   | CHR_HSCHR19KIR_G085_BA1_HAP_C TG3_1     |
| CHR_HSCHR12_3_C TG2        | CHR_HSCHR17_3_C TG2   | CHR_HSCHR19KIR_G248_A_HAP_C TG3_1       |
| CHR_HSCHR12_3_C TG2_1      | CHR_HSCHR17_3_C TG4   | CHR_HSCHR19KIR_G248_BA2_HAP_C TG3_1     |
| CHR_HSCHR12_4_C TG2        | CHR_HSCHR17_4_C TG4   | CHR_HSCHR19KIR_GRC212_AB_HAP_C TG3_1    |
| CHR_HSCHR12_4_C TG2_1      | CHR_HSCHR17_5_C TG4   | CHR_HSCHR19KIR_GRC212_BA1_HAP_C TG3_1   |
| CHR_HSCHR12_5_C TG2        | CHR_HSCHR17_6_C TG4   | CHR_HSCHR19KIR_HG2393_C TG3_1           |
| CHR_HSCHR12_5_C TG2_1      | CHR_HSCHR17_7_C TG4   | CHR_HSCHR19KIR_HG2394_C TG3_1           |
| CHR_HSCHR12_6_C TG2_1      | CHR_HSCHR17_8_C TG4   | CHR_HSCHR19KIR_HG2396_C TG3_1           |
| CHR_HSCHR12_7_C TG2_1      | CHR_HSCHR17_9_C TG4   | CHR_HSCHR19KIR_LUCE_A_HAP_C TG3_1       |
| CHR_HSCHR12_8_C TG2_1      | CHR_HSCHR18_1_C TG1   | CHR_HSCHR19KIR_LUCE_BDEL_HAP_C TG3_1    |
| CHR_HSCHR12_9_C TG2_1      | CHR_HSCHR18_1_C TG1_1 | CHR_HSCHR19KIR_RP5_B_HAP_C TG3_1        |
| CHR_HSCHR13_1_C TG1        | CHR_HSCHR18_1_C TG2   | CHR_HSCHR19KIR_RSH_A_HAP_C TG3_1        |
| CHR_HSCHR13_1_C TG2        | CHR_HSCHR18_1_C TG2_1 | CHR_HSCHR19KIR_RSH_BA2_HAP_C TG3_1      |
| CHR_HSCHR13_1_C TG3        | CHR_HSCHR18_2_C TG1_1 | CHR_HSCHR19KIR_T7526_A_HAP_C TG3_1      |

|                                      |                     |                          |
|--------------------------------------|---------------------|--------------------------|
| CHR_HSCHR19KIR_T7526_BDEL_HAP_CTG3_1 | CHR_HSCHR3_1_CTG3   | CHR_HSCHR6_1_CTG4        |
| CHR_HSCHR19LRC_COX1_CTG3_1           | CHR_HSCHR3_2_CTG2_1 | CHR_HSCHR6_1_CTG5        |
| CHR_HSCHR19LRC_COX2_CTG3_1           | CHR_HSCHR3_2_CTG3   | CHR_HSCHR6_1_CTG6        |
| CHR_HSCHR19LRC_LRC_I_CTG3_1          | CHR_HSCHR3_3_CTG1   | CHR_HSCHR6_1_CTG7        |
| CHR_HSCHR19LRC_LRC_J_CTG3_1          | CHR_HSCHR3_3_CTG2_1 | CHR_HSCHR6_1_CTG8        |
| CHR_HSCHR19LRC_LRC_S_CTG3_1          | CHR_HSCHR3_3_CTG3   | CHR_HSCHR6_1_CTG9        |
| CHR_HSCHR19LRC_LRC_T_CTG3_1          | CHR_HSCHR3_4_CTG1   | CHR_HSCHR6_8_CTG1        |
| CHR_HSCHR19LRC_PGF1_CTG3_1           | CHR_HSCHR3_4_CTG2_1 | CHR_HSCHR6_MHC_APD_CTG1  |
| CHR_HSCHR19LRC_PGF2_CTG3_1           | CHR_HSCHR3_4_CTG3   | CHR_HSCHR6_MHC_COX_CTG1  |
| CHR_HSCHR2_1_CTG1                    | CHR_HSCHR3_5_CTG2_1 | CHR_HSCHR6_MHC_DBB_CTG1  |
| CHR_HSCHR2_1_CTG15                   | CHR_HSCHR3_5_CTG3   | CHR_HSCHR6_MHC_MANN_CTG1 |
| CHR_HSCHR2_1_CTG5                    | CHR_HSCHR3_6_CTG2_1 | CHR_HSCHR6_MHC_MCF_CTG1  |
| CHR_HSCHR2_1_CTG7                    | CHR_HSCHR3_6_CTG3   | CHR_HSCHR6_MHC_QBL_CTG1  |
| CHR_HSCHR2_1_CTG7_2                  | CHR_HSCHR3_7_CTG2_1 | CHR_HSCHR6_MHC_SSTO_CTG1 |
| CHR_HSCHR2_2_CTG1                    | CHR_HSCHR3_7_CTG3   | CHR_HSCHR7_1_CTG1        |
| CHR_HSCHR2_2_CTG15                   | CHR_HSCHR3_8_CTG2_1 | CHR_HSCHR7_1_CTG4_4      |
| CHR_HSCHR2_2_CTG7                    | CHR_HSCHR3_8_CTG3   | CHR_HSCHR7_1_CTG6        |
| CHR_HSCHR2_2_CTG7_2                  | CHR_HSCHR3_9_CTG2_1 | CHR_HSCHR7_1_CTG7        |
| CHR_HSCHR2_3_CTG1                    | CHR_HSCHR3_9_CTG3   | CHR_HSCHR7_2_CTG1        |
| CHR_HSCHR2_3_CTG15                   | CHR_HSCHR4_1_CTG12  | CHR_HSCHR7_2_CTG4_4      |
| CHR_HSCHR2_3_CTG7_2                  | CHR_HSCHR4_1_CTG4   | CHR_HSCHR7_2_CTG6        |
| CHR_HSCHR2_4_CTG1                    | CHR_HSCHR4_1_CTG6   | CHR_HSCHR7_2_CTG7        |
| CHR_HSCHR2_4_CTG7_2                  | CHR_HSCHR4_1_CTG8_1 | CHR_HSCHR7_3_CTG1        |
| CHR_HSCHR2_5_CTG7_2                  | CHR_HSCHR4_1_CTG9   | CHR_HSCHR7_3_CTG4_4      |
| CHR_HSCHR2_6_CTG7_2                  | CHR_HSCHR4_11_CTG12 | CHR_HSCHR7_3_CTG6        |
| CHR_HSCHR2_7_CTG7_2                  | CHR_HSCHR4_12_CTG12 | CHR_HSCHR8_1_CTG1        |
| CHR_HSCHR2_8_CTG7_2                  | CHR_HSCHR4_2_CTG12  | CHR_HSCHR8_1_CTG6        |
| CHR_HSCHR20_1_CTG1                   | CHR_HSCHR4_2_CTG4   | CHR_HSCHR8_1_CTG7        |
| CHR_HSCHR20_1_CTG2                   | CHR_HSCHR4_3_CTG12  | CHR_HSCHR8_2_CTG1        |
| CHR_HSCHR20_1_CTG3                   | CHR_HSCHR4_4_CTG12  | CHR_HSCHR8_2_CTG7        |
| CHR_HSCHR20_1_CTG4                   | CHR_HSCHR4_5_CTG12  | CHR_HSCHR8_3_CTG1        |
| CHR_HSCHR21_1_CTG1_1                 | CHR_HSCHR4_6_CTG12  | CHR_HSCHR8_3_CTG7        |
| CHR_HSCHR21_2_CTG1_1                 | CHR_HSCHR4_7_CTG12  | CHR_HSCHR8_4_CTG1        |
| CHR_HSCHR21_3_CTG1_1                 | CHR_HSCHR4_8_CTG12  | CHR_HSCHR8_4_CTG7        |
| CHR_HSCHR21_4_CTG1_1                 | CHR_HSCHR4_9_CTG12  | CHR_HSCHR8_5_CTG1        |
| CHR_HSCHR21_5_CTG2                   | CHR_HSCHR5_1_CTG1   | CHR_HSCHR8_5_CTG7        |
| CHR_HSCHR21_6_CTG1_1                 | CHR_HSCHR5_1_CTG1_1 | CHR_HSCHR8_6_CTG1        |
| CHR_HSCHR21_8_CTG1_1                 | CHR_HSCHR5_1_CTG5   | CHR_HSCHR8_6_CTG7        |
| CHR_HSCHR22_1_CTG1                   | CHR_HSCHR5_2_CTG1   | CHR_HSCHR8_7_CTG1        |
| CHR_HSCHR22_1_CTG2                   | CHR_HSCHR5_2_CTG1_1 | CHR_HSCHR8_7_CTG7        |
| CHR_HSCHR22_1_CTG3                   | CHR_HSCHR5_2_CTG5   | CHR_HSCHR8_8_CTG1        |
| CHR_HSCHR22_1_CTG4                   | CHR_HSCHR5_3_CTG1   | CHR_HSCHR8_9_CTG1        |
| CHR_HSCHR22_1_CTG5                   | CHR_HSCHR5_3_CTG1_1 | CHR_HSCHR9_1_CTG1        |
| CHR_HSCHR22_1_CTG6                   | CHR_HSCHR5_3_CTG5   | CHR_HSCHR9_1_CTG2        |
| CHR_HSCHR22_1_CTG7                   | CHR_HSCHR5_4_CTG1   | CHR_HSCHR9_1_CTG3        |
| CHR_HSCHR22_2_CTG1                   | CHR_HSCHR5_4_CTG1_1 | CHR_HSCHR9_1_CTG4        |
| CHR_HSCHR22_3_CTG1                   | CHR_HSCHR5_5_CTG1   | CHR_HSCHR9_1_CTG5        |
| CHR_HSCHR22_4_CTG1                   | CHR_HSCHR5_6_CTG1   | CHR_HSCHR9_1_CTG6        |
| CHR_HSCHR22_5_CTG1                   | CHR_HSCHR5_7_CTG1   | CHR_HSCHR9_1_CTG7        |
| CHR_HSCHR22_6_CTG1                   | CHR_HSCHR5_8_CTG1   | CHR_HSCHRX_1_CTG3        |
| CHR_HSCHR22_7_CTG1                   | CHR_HSCHR5_9_CTG1   | CHR_HSCHRX_2_CTG12       |
| CHR_HSCHR22_8_CTG1                   | CHR_HSCHR6_1_CTG10  | CHR_HSCHRX_2_CTG3        |
| CHR_HSCHR3_1_CTG1                    | CHR_HSCHR6_1_CTG2   | CHR_HSCHRX_3_CTG7        |
| CHR_HSCHR3_1_CTG2_1                  | CHR_HSCHR6_1_CTG3   |                          |

**Table S1:** The 329 alternate loci and scaffolds in Human GRCh38 assembly supported in the SeqTailor webserver.

|                                    |
|------------------------------------|
| protein-coding                     |
| IG genes                           |
| TR genes                           |
| non-stop decay                     |
| nonsense mediated decay            |
| polymorphic pseudogene             |
| processed pseudogene               |
| processed transcript               |
| pseudogene                         |
| transcribed processed pseudogene   |
| transcribed unitary pseudogene     |
| transcribed unprocessed pseudogene |
| translated processed pseudogene    |
| unitary pseudogene                 |
| unprocessed pseudogene             |

**Table S2:** The 15 transcript biotypes that belonging to the categories of protein coding and pseudogenes, that have been adopted in the data collection in the SeqTailor webserver.

| Comments                                                        | Actions                        |
|-----------------------------------------------------------------|--------------------------------|
| <b>Genetic Variants in VCF Files (CHROM, POS, ID, REF, ALT)</b> |                                |
| Normal                                                          | Normal                         |
| Duplicated                                                      | Skipped                        |
| Field mistake                                                   | Skipped                        |
| Empty REF allele                                                | Skipped                        |
| Unmatched REF allele to the reference genome                    | Skipped                        |
| Identical REF and ALT allele                                    | Skipped                        |
| Negative window size                                            | Skipped                        |
| Too long window size                                            | Reduced window size to 5,000bp |
| <b>Genetic Ranges in BED Files (CHROM, START, END)</b>          |                                |
| Normal                                                          | Normal                         |
| Duplicated                                                      | Skipped                        |
| Field mistake                                                   | Skipped                        |
| Negative START                                                  | Set Start to 0                 |
| Negative END                                                    | Skipped                        |
| Negative START and END                                          | Skipped                        |
| START is greater than END                                       | Swap START with END            |
| Too long genomic range                                          | Trim at 10,000bp from START    |

**Table S3:** The exception handling in the SeqTailor webserver for VCF files and BED files.

| <b>Organism</b> | <b>Standard Genetic Codes</b> | <b>Mitochondrial Genetic Codes</b> |
|-----------------|-------------------------------|------------------------------------|
| Human           | Table 1                       | Table 2                            |
| Chimpanzee      | Table 1                       | Table 2                            |
| Mouse           | Table 1                       | Table 2                            |
| Rat             | Table 1                       | Table 2                            |
| Cow             | Table 1                       | Table 2                            |
| Chicken         | Table 1                       | Table 2                            |
| Lizard          | Table 1                       | Table 2                            |
| Zebrafish       | Table 1                       | Table 2                            |
| Fruitfly        | Table 1                       | Table 5                            |
| Arabidopsis     | Table 1                       | Table 1                            |
| Rice            | Table 1                       | Table 1                            |

**Table S4:** The standard and mitochondrial genetic codes tables for the supported 11 organisms in the SeqTailor webserver, according to the NCBI Taxonomy Database.

| Genetic Code Table 1 |            |   |       |            |   |
|----------------------|------------|---|-------|------------|---|
| Codon                | Amino Acid |   | Codon | Amino Acid |   |
| TTT                  | Phe        | F | ATT   | Ile        | I |
| TCT                  | Ser        | S | ACT   | Thr        | T |
| TAT                  | Tyr        | Y | AAT   | Asn        | N |
| TGT                  | Cys        | C | AGT   | Ser        | S |
| TTC                  | Phe        | F | ATC   | Ile        | I |
| TCC                  | Ser        | S | ACC   | Thr        | T |
| TAC                  | Tyr        | Y | AAC   | Asn        | N |
| TGC                  | Cys        | C | AGC   | Ser        | S |
| TTA                  | Leu        | L | ATA   | Ile        | I |
| TCA                  | Ser        | S | ACA   | Thr        | T |
| TAA                  | Ter        | * | AAA   | Lys        | K |
| TGA                  | Ter        | * | AGA   | Arg        | R |
| TTG                  | Leu        | L | ATG   | Met        | M |
| TCG                  | Ser        | S | ACG   | Thr        | T |
| TAG                  | Ter        | * | AAG   | Lys        | K |
| TGG                  | Trp        | W | AGG   | Arg        | R |
| CTT                  | Leu        | L | GTT   | Val        | V |
| CCT                  | Pro        | P | GCT   | Ala        | A |
| CAT                  | His        | H | GAT   | Asp        | D |
| CGT                  | Arg        | R | GGT   | Gly        | G |
| CTC                  | Leu        | L | GTC   | Val        | V |
| CCC                  | Pro        | P | GCC   | Ala        | A |
| CAC                  | His        | H | GAC   | Asp        | D |
| CGC                  | Arg        | R | GGC   | Gly        | G |
| CTA                  | Leu        | L | GTA   | Val        | V |
| CCA                  | Pro        | P | GCA   | Ala        | A |
| CAA                  | Gln        | Q | GAA   | Glu        | E |
| CGA                  | Arg        | R | GGA   | Gly        | G |
| CTG                  | Leu        | L | GTG   | Val        | V |
| CCG                  | Pro        | P | GCG   | Ala        | A |
| CAG                  | Gln        | Q | GAG   | Glu        | E |
| CGG                  | Arg        | R | GGG   | Gly        | G |

**Table S5:** The genetic codes table 1.

| Genetic Code Table 2 |            |   |       |            |   |
|----------------------|------------|---|-------|------------|---|
| Codon                | Amino Acid |   | Codon | Amino Acid |   |
| TTT                  | Phe        | F | ATT   | Ile        | I |
| TCT                  | Ser        | S | ACT   | Thr        | T |
| TAT                  | Tyr        | Y | AAT   | Asn        | N |
| TGT                  | Cys        | C | AGT   | Ser        | S |
| TTC                  | Phe        | F | ATC   | Ile        | I |
| TCC                  | Ser        | S | ACC   | Thr        | T |
| TAC                  | Tyr        | Y | AAC   | Asn        | N |
| TGC                  | Cys        | C | AGC   | Ser        | S |
| TTA                  | Leu        | L | ATA   | Met        | M |
| TCA                  | Ser        | S | ACA   | Thr        | T |
| TAA                  | Ter        | * | AAA   | Lys        | K |
| TGA                  | Trp        | W | AGA   | Ter        | * |
| TTG                  | Leu        | L | ATG   | Met        | M |
| TCG                  | Ser        | S | ACG   | Thr        | T |
| TAG                  | Ter        | * | AAG   | Lys        | K |
| TGG                  | Trp        | W | AGG   | Ter        | * |
| CTT                  | Leu        | L | GTT   | Val        | V |
| CCT                  | Pro        | P | GCT   | Ala        | A |
| CAT                  | His        | H | GAT   | Asp        | D |
| CGT                  | Arg        | R | GGT   | Gly        | G |
| CTC                  | Leu        | L | GTC   | Val        | V |
| CCC                  | Pro        | P | GCC   | Ala        | A |
| CAC                  | His        | H | GAC   | Asp        | D |
| CGC                  | Arg        | R | GGC   | Gly        | G |
| CTA                  | Leu        | L | GTA   | Val        | V |
| CCA                  | Pro        | P | GCA   | Ala        | A |
| CAA                  | Gln        | Q | GAA   | Glu        | E |
| CGA                  | Arg        | R | GGA   | Gly        | G |
| CTG                  | Leu        | L | GTG   | Val        | V |
| CCG                  | Pro        | P | GCG   | Ala        | A |
| CAG                  | Gln        | Q | GAG   | Glu        | E |
| CGG                  | Arg        | R | GGG   | Gly        | G |

**Table S6:** The genetic codes table 2.

| Genetic Code Table 5 |            |   |       |            |   |
|----------------------|------------|---|-------|------------|---|
| Codon                | Amino Acid |   | Codon | Amino Acid |   |
| TTT                  | Phe        | F | ATT   | Ile        | I |
| TCT                  | Ser        | S | ACT   | Thr        | T |
| TAT                  | Tyr        | Y | AAT   | Asn        | N |
| TGT                  | Cys        | C | AGT   | Ser        | S |
| TTC                  | Phe        | F | ATC   | Ile        | I |
| TCC                  | Ser        | S | ACC   | Thr        | T |
| TAC                  | Tyr        | Y | AAC   | Asn        | N |
| TGC                  | Cys        | C | AGC   | Ser        | S |
| TTA                  | Leu        | L | ATA   | Met        | M |
| TCA                  | Ser        | S | ACA   | Thr        | T |
| TAA                  | Ter        | * | AAA   | Lys        | K |
| TGA                  | Trp        | W | AGA   | Ser        | S |
| TTG                  | Leu        | L | ATG   | Met        | M |
| TCG                  | Ser        | S | ACG   | Thr        | T |
| TAG                  | Ter        | * | AAG   | Lys        | K |
| TGG                  | Trp        | W | AGG   | Ser        | S |
| CTT                  | Leu        | L | GTT   | Val        | V |
| CCT                  | Pro        | P | GCT   | Ala        | A |
| CAT                  | His        | H | GAT   | Asp        | D |
| CGT                  | Arg        | R | GGT   | Gly        | G |
| CTC                  | Leu        | L | GTC   | Val        | V |
| CCC                  | Pro        | P | GCC   | Ala        | A |
| CAC                  | His        | H | GAC   | Asp        | D |
| CGC                  | Arg        | R | GGC   | Gly        | G |
| CTA                  | Leu        | L | GTA   | Val        | V |
| CCA                  | Pro        | P | GCA   | Ala        | A |
| CAA                  | Gln        | Q | GAA   | Glu        | E |
| CGA                  | Arg        | R | GGA   | Gly        | G |
| CTG                  | Leu        | L | GTG   | Val        | V |
| CCG                  | Pro        | P | GCG   | Ala        | A |
| CAG                  | Gln        | Q | GAG   | Glu        | E |
| CGG                  | Arg        | R | GGG   | Gly        | G |

**Table S7:** The genetic codes table 5.



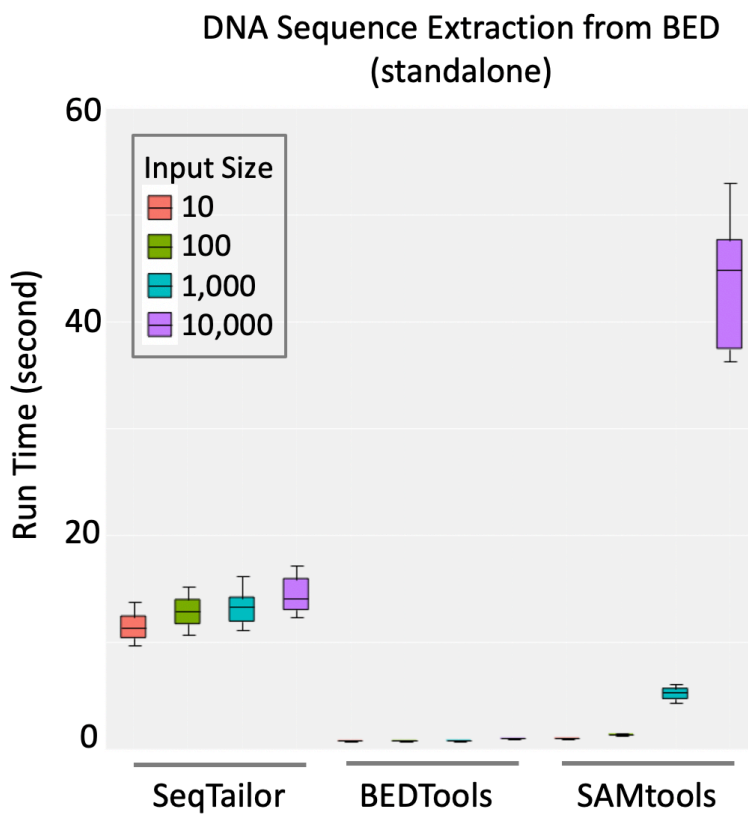

**Figure S1:** Runtime performance in extracting DNA reference sequences from varying sizes of input BED data, by SeqTailor-standalone, BEDTools, and SAMtools, in a script-based manner.

## Case Study

SeqTailor aims to make it efficient to further investigate the genomic variant data and renders sequence-based software more accessible. To demonstrate the practical power of SeqTailor to bridge the gap between genomic variations and sequence-based tools for analyses and predictions, we exhibited a case study on pathogenic genetic variants with different effects and different clinical consequences identified in five human genes (*MSH2*, *BRAF*, *GJB2*, *BRCA2*, and *IL2RG*) by the HGMD professional database (1) and the ClinVar database (2).

### Case Study 1: DNA sequence extraction for a variant in *MSH2*

A single nucleotide variant (ClinVar: SCV000107433.2, dbSNP: rs587779138), changes T to G on Chr2:47635062 forward strand of GRCh37 assembly, is a deep intronic variant of *MSH2* gene that has been shown to cause Lynch syndrome through the creation of a new splice donor site with pseudoexon activation (3).

#### NM\_000251.2(MSH2):c.212-478T>G

|                       |                                                                                                                                                                                                                                                                                                                       |
|-----------------------|-----------------------------------------------------------------------------------------------------------------------------------------------------------------------------------------------------------------------------------------------------------------------------------------------------------------------|
| Allele ID:            | 96369                                                                                                                                                                                                                                                                                                                 |
| Variant type:         | single nucleotide variant                                                                                                                                                                                                                                                                                             |
| Cytogenetic location: | 2p21                                                                                                                                                                                                                                                                                                                  |
| Genomic location:     | <ul style="list-style-type: none"> <li>Chr2: 47407923 (on Assembly GRCh38)</li> <li>Chr2: 47635062 (on Assembly GRCh37)</li> </ul>                                                                                                                                                                                    |
| HGVS:                 | <ul style="list-style-type: none"> <li>NG_007110.2:g.9800T&gt;G</li> <li>NM_000251.2:c.212-478T&gt;G</li> <li>NC_000002.12:g.47407923T&gt;G (GRCh38)</li> <li>LRG_218t1:c.212-478T&gt;G</li> <li>NC_000002.11:g.47635062T&gt;G (GRCh37)</li> <li>NM_000251.1:c.212-478T&gt;G</li> <li>LRG_218:g.9800T&gt;G</li> </ul> |

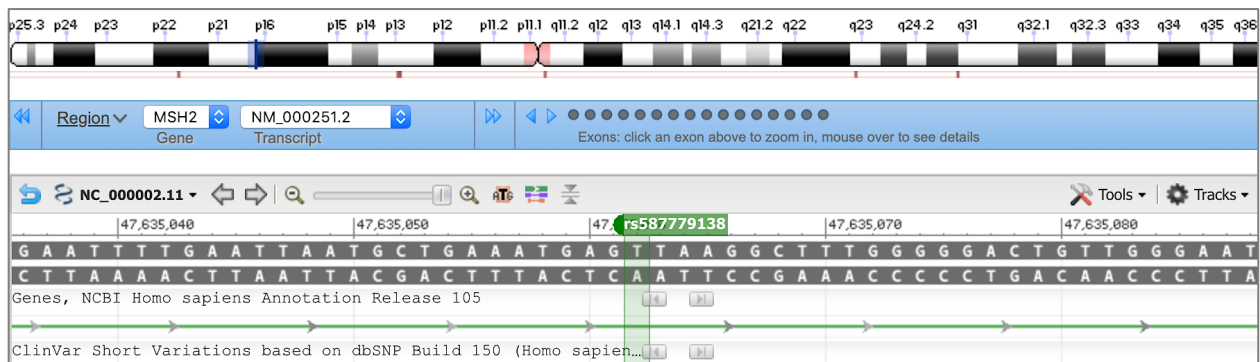

With SeqTailor, the DNA sequence (+/-100 bp) around this variant (chr2-47635062-T-G) was rapidly extracted. In the output sequence, this variant is located at position 101.

Reference Genome:

Coordinate:  1-based  0-based

Strand:  both  forward  reverse

**For Genomic Variants in VCF**

Window Size: (in bp)

uniform (+/-):  bp

different (+):  bp (-):  bp

Nearest Splice Site Annotation:  no  canonical  all

Neighbor Variants Within Window:  no  yes

Output Sequence:  ref & alt  ref  alt

Genomic Variants: (no more than 10,000 genomic variants)

provide the first 5 columns of the genomic variants in VCF format. ([check sample VCF](#))

|      |          |   |   |   |
|------|----------|---|---|---|
| chr2 | 47635062 | . | T | G |
|------|----------|---|---|---|

```

>2_47635062_T_G|+|ref
AACTAACTTGCTTTTGATTTGACAGGCTCATATGCCGAAAGGACTTACCTTGCTTGAATGAGACTTTGGACTGGAATTT
TGAATTAATGCTGAAATGAGTTAAGGCTTTGGGGACTGTTGGGAATGCATGATTGGTTTTGAAATGTGAGGACATGAGA
TTTGGGAGGGGTCATGGCAGAATGATATGGTTTGGCTATGT
>2_47635062_T_G|+|alt
AACTAACTTGCTTTTGATTTGACAGGCTCATATGCCGAAAGGACTTACCTTGCTTGAATGAGACTTTGGACTGGAATTT
TGAATTAATGCTGAAATGAGTTAAGGCTTTGGGGACTGTTGGGAATGCATGATTGGTTTTGAAATGTGAGGACATGAGA
TTTGGGAGGGGTCATGGCAGAATGATATGGTTTGGCTATGT
    
```

The output sequences can be directly used as the input for sequence-based splicing prediction tools (e.g. NetGene2 (4)), to evaluate the impact of this variant on splicing. A number of tools are available for this purpose, and NetGene2 was selected here for demonstration purposes only. When provided with the reference sequence and alternative sequence, NetGene2 gave the splicing predictions for both sequences, as shown below. In this example, NetGene2 identified donor splice site at position 101 on the alternative sequence, but no donor splice site in the reference sequence.

**Prediction on the reference sequence**

Donor splice sites, direct strand

-----

No donor site predictions above threshold.

**Prediction on the alternative sequence**

Donor splice sites, direct strand

-----

| pos | 5'->3' | phase | strand | confidence | 5'         | exon | intron     | 3' |
|-----|--------|-------|--------|------------|------------|------|------------|----|
| 101 |        | 1     | +      | 0.83       | CTGAAATGAG | ^    | GTAAGGCTTT |    |

## Case Study 2: DNA sequence extraction for a variant in *BRCA2*

An indel (ClinVar: SCV000637244.1, dbSNP: rs587781422), deletes GG and inserts TA on Chr13:32954282–32954283 forward strand of the GRCh37 assembly, is a splicing variant of the *BRCA2* gene that has been associated with hereditary breast-ovarian cancer (5). This 2-bp variant sits exactly at the splicing site, spanning from the last nucleotide of exon 24 of *BRCA2* gene to the first nucleotide of the following intron.

### NM\_000059.3(BRCA2):c.9256\_9256+1delGGinsTA

|                       |                                                                                                                                                                                                                                                                                                                                                              |
|-----------------------|--------------------------------------------------------------------------------------------------------------------------------------------------------------------------------------------------------------------------------------------------------------------------------------------------------------------------------------------------------------|
| Allele ID:            | 150706                                                                                                                                                                                                                                                                                                                                                       |
| Variant type:         | Indel                                                                                                                                                                                                                                                                                                                                                        |
| Cytogenetic location: | 13q13.1                                                                                                                                                                                                                                                                                                                                                      |
| Genomic location:     | <ul style="list-style-type: none"> <li>• Chr13: 32380145 - 32380146 (on Assembly GRCh38)</li> <li>• Chr13: 32954282 - 32954283 (on Assembly GRCh37)</li> </ul>                                                                                                                                                                                               |
| HGVs:                 | <ul style="list-style-type: none"> <li>• NG_012772.3:g.69666_69667delGGinsTA</li> <li>• NM_000059.3:c.9256_9256+1delGGinsTA</li> <li>• NC_000013.11:g.32380145_32380146delGGinsTA (GRCh38)</li> <li>• LRG_293t1:c.9256_9256+1delGGinsTA</li> <li>• NC_000013.10:g.32954282_32954283delGGinsTA (GRCh37)</li> <li>• LRG_293:g.69666_69667delGGinsTA</li> </ul> |

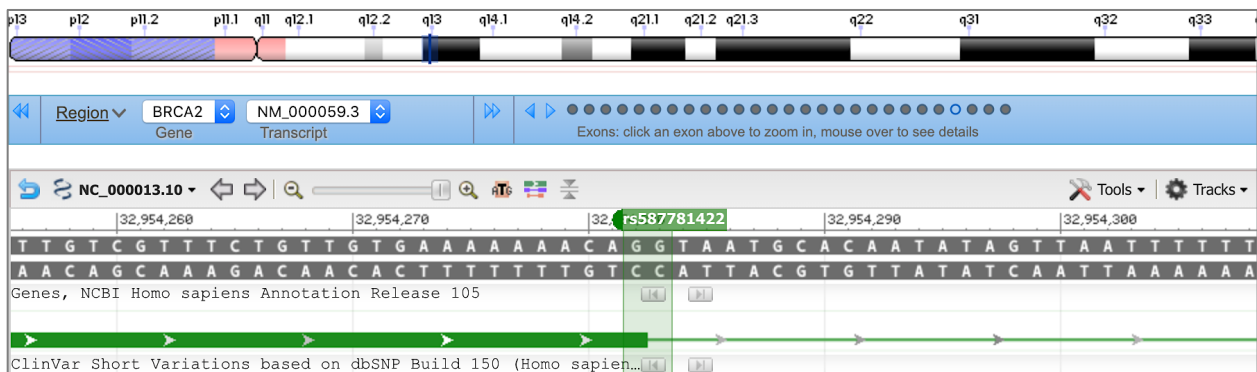

By submitting this variant (chr13-32954282-GG-TA) and choosing to annotate the nearest splice site, SeqTailor extracted the ref./alt. DNA sequences, and provided the distance from the variant to the nearest splice site (+ve distance: downstream, -ve distance: upstream, and 0: exactly at the splice site), as well as the belonging gene symbol, transcript ID, exon number, and donor/acceptor site information. Please note that, in SeqTailor, the nearest splice site refers to the first nucleotide of the nearest exon (as acceptor site) or the last nucleotide of the nearest exon (as donor site).

Reference Genome: Human [Homo sapiens] (GRCh37/hg19)

Coordinate: 1-based     0-based

Strand: both     forward     reverse

**For Genomic Variants in VCF**

Window Size: (in bp)

uniform (+/-): 25 bp

different (+):    bp    (-):    bp

Nearest Splice Site Annotation:     no     canonical     all

Neighbor Variants Within Window:     no     yes

Output Sequence:     ref & alt     ref     alt

Genomic Variants: (no more than 10,000 genomic variants)

provide the first 5 columns of the genomic variants in VCF format. (check sample VCF)

```
chr13 32954282 . GG TA
```

```
>13_32954282_GG_TA|+|ref|NearestSplice:0;BRCA2;ENST00000380152;exon_24;donor_site
TGTCGTTTCGTGTGAAAAAACAGGTAATGCACAATATAGTTAATTTTT
>13_32954282_GG_TA|+|alt|NearestSplice:0;BRCA2;ENST00000380152;exon_24;donor_site
TGTCGTTTCGTGTGAAAAACATAATAATGCACAATATAGTTAATTTTT
```

The output sequences can be rapidly used for splicing prediction (e.g. NNSPLICE (6)). Again, the tool used here were selected for demonstration purposes only. NNSPLICE identified a donor splice site in the reference sequence, but not in the alternative sequence.

**Reference Sequence:**

**Donor site predictions for 129.85.163.169.19962.0 :**

| Start | End | Score | Exon    | Intron   |
|-------|-----|-------|---------|----------|
| 20    | 34  | 0.95  | aaaacag | gtaatgca |

**Alternative Sequence:**

**Donor site predictions for 129.85.163.169.20244.0 :**

| Start | End | Score | Exon | Intron |
|-------|-----|-------|------|--------|
|-------|-----|-------|------|--------|

### Case Study 3: DNA sequence extraction for a variant in IL2RG

A single nucleotide variant (ClinVar: SCV000637244.1, dbSNP: rs886039387), changes A to G on ChrX:70330553 reverse strand of the GRCh37 assembly, is an intronic variant of the *IL2RG* gene that has been reported in association with X-linked severe combined immunodeficiency (7). This variant does not directly change the encoded amino acid sequence, but the experimental studies have shown that this intronic mutation causes aberrant splicing in the mRNA as shown by RT-PCR on B-cell line of an individual with this variant (7).

#### NM\_000206.2(IL2RG):c.270-15A>G

|                       |                                                                                                                                                                                                                                                                                            |
|-----------------------|--------------------------------------------------------------------------------------------------------------------------------------------------------------------------------------------------------------------------------------------------------------------------------------------|
| Allele ID:            | 260341                                                                                                                                                                                                                                                                                     |
| Variant type:         | single nucleotide variant                                                                                                                                                                                                                                                                  |
| Cytogenetic location: | Xq13.1                                                                                                                                                                                                                                                                                     |
| Genomic location:     | <ul style="list-style-type: none"> <li>• ChrX: 71110703 (on Assembly GRCh38)</li> <li>• ChrX: 70330553 (on Assembly GRCh37)</li> </ul>                                                                                                                                                     |
| HGVs:                 | <ul style="list-style-type: none"> <li>• NG_009088.1:g.5851A&gt;G</li> <li>• NM_000206.2:c.270-15A&gt;G</li> <li>• NC_000023.11:g.71110703T&gt;C (GRCh38)</li> <li>• LRG_150t1:c.270-15A&gt;G</li> <li>• NC_000023.10:g.70330553T&gt;C (GRCh37)</li> <li>• LRG_150:g.5851A&gt;G</li> </ul> |

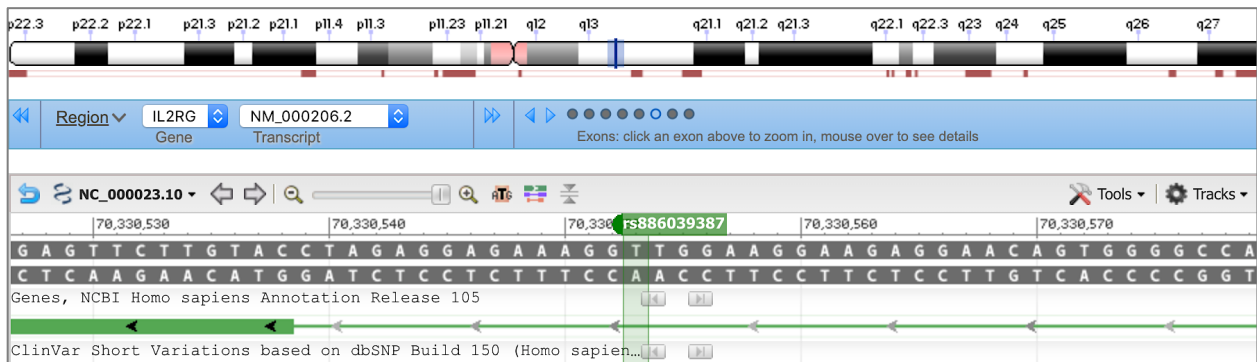

As the *IL2RG* gene is on the reverse strand, its VCF format is converted to (chrX-70330553-T-C). SeqTailor extracted its ref./alt. DNA sequences, and informed its nearest splice site (acceptor site) is located at 15bp downstream from the position of the variant. The sequence colored in orange represent the exons.



Reference Genome: Human [Homo sapiens] (GRCh37/hg19)

Coordinate:  1-based  0-based

Strand:  both  forward  reverse

**For Genomic Variants in VCF**

Window Size: (in bp)

uniform (+/-): 50 bp

different (+):  bp (-):  bp

Nearest Splice Site Annotation:  no  canonical  all

Neighbor Variants Within Window:  no  yes

Output Sequence:  ref & alt  ref  alt

Genomic Variants: (no more than 10,000 genomic variants)

provide the first 5 columns of the genomic variants in VCF format. (check sample VCF)

```
chrX 70330553 . T C
```

```
>X_70330553_T_C|-|ref
|NearestSplice:+15;IL2RG;ENST00000374202;exon_3;acceptor_site
TCTGGATATCTGCAGTACCCAGATTGGCCCCACTGTTCTCTTCCTTCCAACCTTTCTCCTCTAGGTACAAGAACTCGGA
TAATGATAAAGTCCAGAAGTG
>X_70330553_T_C|-|alt
|NearestSplice:+15;IL2RG;ENST00000374202;exon_3;acceptor_site
TCTGGATATCTGCAGTACCCAGATTGGCCCCACTGTTCTCTTCCTTCCAGCCTTTCTCCTCTAGGTACAAGAACTCGGA
TAATGATAAAGTCCAGAAGTG
```

15bp

The output ref./alt. DNA sequences were directly applied to Human Splicing Finder (8) for splicing analysis. As shown below, Human Splicing Finder predicted a new acceptor site might be created at the position of this variant, by giving splicing score 92.5 for the mutant versus the splicing score 63.55 for the wild-type.

**Reference sequence**

```
1 Ttctggatat ctgcagtacc cagattggcc ccactgttcc tcttcttcc aacctttctc ctctaggtac aagaactcgg ataatgataa agtccagaag
101 tg
```

Total sequence length: 102 nucleotides

**Mutant sequence**

```
1 Ttctggatat ctgcagtacc cagattggcc ccactgttcc tcttcttcc agcctttctc ctctaggtac aagaactcgg ataatgataa agtccagaag
101 tg
```

**HSF Matrices**

| Sequence Position | cDNA Position | Splice site type | Motif         | New splice site | Wild Type | Mutant | If cryptic site use, exon length variation | Variation (%)   |
|-------------------|---------------|------------------|---------------|-----------------|-----------|--------|--------------------------------------------|-----------------|
| 41                | +41           | Acceptor         | tcttcttccaacc | tcttcttccagCC   | 63.55     | 92.5   | NA                                         | New site +45.55 |

### Case Study 4: Protein sequence extraction for a variant in *BRAF*

A single nucleotide variant (ClinVar: SCV000616361.3, dbSNP: rs121913355), changes G to A on Chr7: 140481402 reverse strand of the GRCh37 assembly, is a missense variant of *BRAF* that replaces the glycine (G) residue in position 469 with a glutamic acid (E), and has been associated with cardio-facio-cutaneous syndrome (9).

|                       |                                                                                                                                                                                                                                                                                                                                                                                                                                                                          |
|-----------------------|--------------------------------------------------------------------------------------------------------------------------------------------------------------------------------------------------------------------------------------------------------------------------------------------------------------------------------------------------------------------------------------------------------------------------------------------------------------------------|
| Allele ID:            | 29013                                                                                                                                                                                                                                                                                                                                                                                                                                                                    |
| Variant type:         | single nucleotide variant                                                                                                                                                                                                                                                                                                                                                                                                                                                |
| Cytogenetic location: | 7q34                                                                                                                                                                                                                                                                                                                                                                                                                                                                     |
| Genomic location:     | <ul style="list-style-type: none"> <li>• Chr7: 140781602 (on Assembly GRCh38)</li> <li>• Chr7: 140481402 (on Assembly GRCh37)</li> </ul>                                                                                                                                                                                                                                                                                                                                 |
| Other names:          | <ul style="list-style-type: none"> <li>• p.G469E:GGA&gt;GAA</li> </ul>                                                                                                                                                                                                                                                                                                                                                                                                   |
| Protein change:       | G469E                                                                                                                                                                                                                                                                                                                                                                                                                                                                    |
| HGVS:                 | <ul style="list-style-type: none"> <li>• NG_007873.3:g.148163G&gt;A</li> <li>• NM_004333.5:c.1406G&gt;A</li> <li>• NP_004324.2:p.Gly469Glu</li> <li>• NC_000007.14:g.140781602C&gt;T (GRCh38)</li> <li>• LRG_299t1:c.1406G&gt;A</li> <li>• NC_000007.13:g.140481402C&gt;T (GRCh37)</li> <li>• NG_007873.2:g.148163G&gt;A</li> <li>• NM_004333.4:c.1406G&gt;A</li> <li>• P15056:p.Gly469Glu</li> <li>• LRG_299p1:p.Gly469Glu</li> <li>• LRG_299:g.148163G&gt;A</li> </ul> |

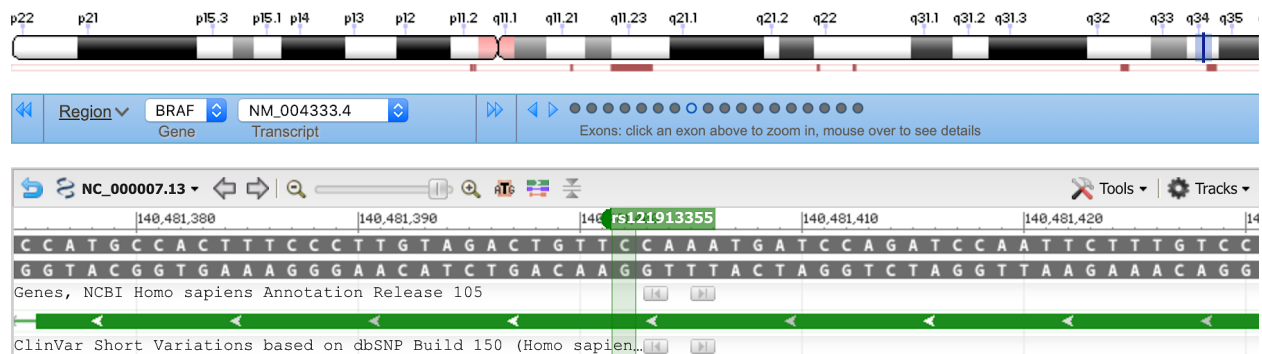

As the *BRAF* gene is located on the reverse strand, the HGVS nomenclature of this variant becomes (g.140481402C>T), thus its VCF format becomes (chr7-140481402-C-T). SeqTailor was then used to annotate the variant by the built-in SnpEff (10), followed by extracting the protein sequence (+/- 25 aa) around this missense variant of *BRAF*.



🔗 Reference Genome: Human [Homo sapiens] (GRCh37/hg19) ▾

✂ Window Size: (in aa)

entire amino acid sequence

uniform (+/-):  aa

different (+):  aa (-):  aa

☰ Protein Sequence Annotation:  canonical  all

🗨 Output Sequence:  ref & alt  ref  alt

⚡ Variants: (no more than 10,000 genomic variants)

📄 provide the first 5 columns of the genomic variants in VCF format. (check sample VCF)

```
chr7 140481402 . C T
```

```
>7_140481402_C_T|BRAF|ENST00000288602|missense_variant|p.Gly469Glu|ref
RDSSDDWEIPDGQITVQQRIGSGSFGTVYKQKWHGDVAVKMLNVTAPTPQQ
>7_140481402_C_T|BRAF|ENST00000288602|missense_variant|p.Gly469Glu|alt
RDSSDDWEIPDGQITVQQRIGSGSFE TVYKQKWHGDVAVKMLNVTAPTPQQ
```

Using the ref./alt. protein sequences, protein family or domain prediction tools (e.g. Pfam (11)) can be used to determine if the variant will lead to a loss of functionally important protein domains. In this case, *BRAF* is a protein kinase transducing mitogenic signals from cell membrane to nucleus, and its kinase domain plays a key role in its function. A Pfam search identified the protein kinase domain in the ref. protein sequence, but not in the alt. protein sequence, suggesting the missense variant may damage the conserved kinase domain, thereby impairing *BRAF* protein function.

Pfam Search of **reference protein sequence**

**Sequence search results**

[Show](#) the detailed description of this results page.

We found **1** Pfam-A match to your search sequence (**all** significant)

[Show](#) the search options and sequence that you submitted.

[Return](#) to the search form to look for Pfam domains on a new sequence.

**Significant Pfam-A Matches**

[Show](#) or [hide](#) all alignments.

| Family                      | Description             | Entry type | Clan                   |
|-----------------------------|-------------------------|------------|------------------------|
| <a href="#">Pkinase_Tyr</a> | Protein tyrosine kinase | Domain     | <a href="#">CL0016</a> |

Pfam Search of **alternative protein sequence**

**Sequence search results**

[Show](#) the detailed description of this results page.

We **did not find any Pfam-A matches** to your search sequence

[Show](#) the search options and sequence that you submitted.

[Return](#) to the search form to look for Pfam domains on a new sequence.

Furthermore, the protein sequence and the altered amino acid can be submitted to PolyPhen-2 (12), to predict the functional effect of the missense variant. In this case, PolyPhen-2 assigned a score of 0.999 to this variant, implying a ‘probably damaging’ effect.

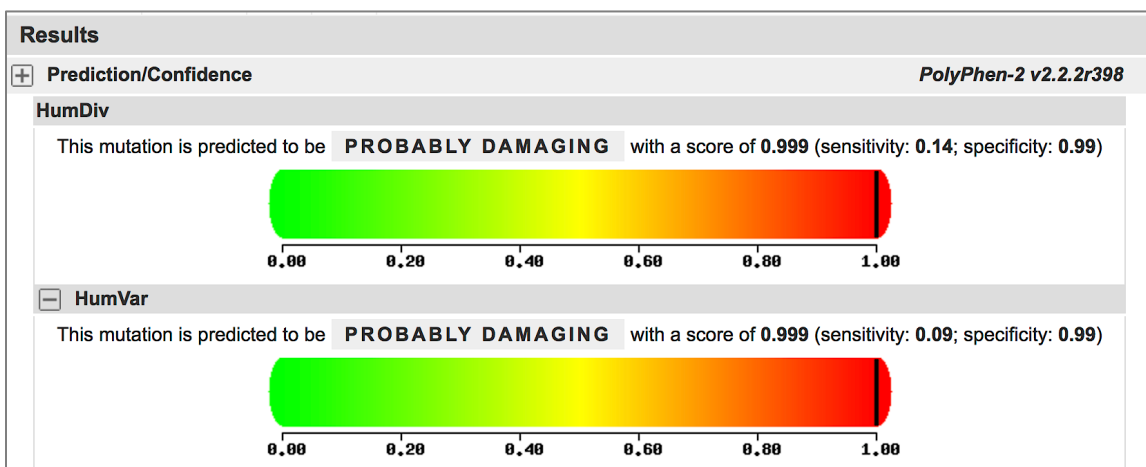

### Case Study 5: Protein sequence extraction for a variant in *GJB2*

A single nucleotide variant (ClinVar: SCV000840535.3, dbSNP: rs80338942), deletes T on Chr13:20763554 reverse strand of the GRCh37 assembly, is a frameshift variant of the *GJB2* gene that changes the amino acid from Leu to Arg at position 56, and has been found to cause Nonsyndromic hearing loss and deafness (13).

**NM\_004004.5(GJB2):c.167delT (p.Leu56Argfs)**

- Allele ID: 32049
- Variant type: Deletion
- Cytogenetic location: 13q12.1
- Genomic location:
  - Chr13: 20189415 (on Assembly GRCh38)
  - Chr13: 20763554 (on Assembly GRCh37)
- Other names:
  - NM\_004004.5(GJB2):c.167delT(p.Leu56Argfs)
  - NM\_004004.5(GJB2):c.167delT
- HGVS:
  - NG\_008358.1:g.8561delT
  - NM\_004004.5:c.167delT
  - NP\_003995.2:p.Leu56Argfs
  - NC\_000013.11:g.20189415delA (GRCh38)
  - NC\_000013.10:g.20763554delA (GRCh37)
  - NM\_004004.5:c.167del
  - NC\_000013.10:g.20763554del (GRCh37)

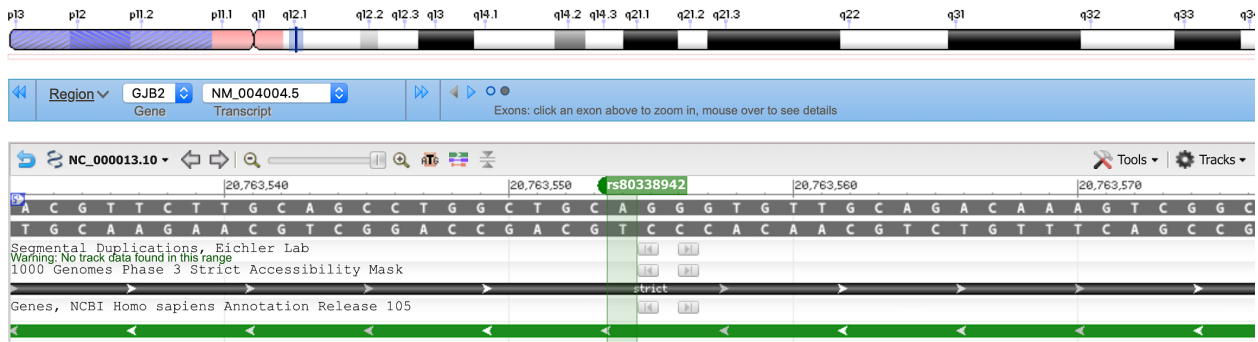

In this example, the reference protein sequence was the entire protein sequence of transcript ENST00000382844 of gene *GJB2*. The variant led to a frameshift occurring at position 56 by changing L to R, thus the following amino acids in the protein sequence will be translated differently. SeqTailor extracts and alters the reference CDS sequence, followed by re-translating the altered CDS sequence to the alternative protein sequence. In this example, the new protein sequence will terminate at 24 amino acids downstream from the frameshifted amino acid. Once the stop codon is encountered, SeqTailor gives a ‘\*’ symbol to inform the sequence termination.

Reference Genome: Human [Homo sapiens] (GRCh37/hg19)

Window Size: (in aa)

entire amino acid sequence

uniform (+/-):  aa

different (+):  aa (-):  aa

Protein Sequence Annotation:  canonical  all

Output Sequence:  ref & alt  ref  alt

Variants: (no more than 10,000 genomic variants)

provide the first 5 columns of the genomic variants in VCF format. (check sample VCF)

|       |          |   |    |   |
|-------|----------|---|----|---|
| chr13 | 20763554 | . | AG | G |
|-------|----------|---|----|---|

```

>13_20763554_AG_G|GJB2|ENST00000382844|frameshift_variant|p.Leu56fs|ref
MDWGTLQTLGGVNHSTSIGKIWLTVLFIFRIMILVVAKEVWGDEQADFVCNTLQPGCKNVCYDHYFPISHIRLWALQ
LIFVSTPALLVAMHVAYRRHEKKRKFIFKGEIKSEFKDIEEIKTKQVRIEGLWWTYTSISIFFRVIFEAAFMYVFYVMDG
FSMQLVKCNAWPCPNTVDCFVSRPTEKTVFTVFMIAVSGICILLNVTELCYLLIRYCSGKSKKPV
>13_20763554_AG_G|GJB2|ENST00000382844|frameshift_variant|p.Leu56fs|alt
MDWGTLQTLGGVNHSTSIGKIWLTVLFIFRIMILVVAKEVWGDEQADFVCNTRSQARTCATITTSPTSPTSGYGPCS
    
```

\*

## **References**

1. Stenson, P.D., Mort, M., Ball, E.V., Evans, K., Hayden, M., Heywood, S., Hussain, M., Phillips, A.D. and Cooper, D.N. (2017) The Human Gene Mutation Database: towards a comprehensive repository of inherited mutation data for medical research, genetic diagnosis and next-generation sequencing studies. *Hum Genet*, **136**, 665-677.
2. Landrum, M.J., Lee, J.M., Riley, G.R., Jang, W., Rubinstein, W.S., Church, D.M. and Maglott, D.R. (2014) ClinVar: public archive of relationships among sequence variation and human phenotype. *Nucleic Acids Res*, **42**, D980-985.
3. Clendenning, M., Buchanan, D.D., Walsh, M.D., Nagler, B., Rosty, C., Thompson, B., Spurdle, A.B., Hopper, J.L., Jenkins, M.A. and Young, J.P. (2011) Mutation deep within an intron of MSH2 causes Lynch syndrome. *Fam Cancer*, **10**, 297-301.
4. Brunak, S., Engelbrecht, J. and Knudsen, S. (1991) Prediction of human mRNA donor and acceptor sites from the DNA sequence. *J Mol Biol*, **220**, 49-65.
5. Acedo, A., Sanz, D.J., Duran, M., Infante, M., Perez-Cabornero, L., Miner, C. and Velasco, E.A. (2012) Comprehensive splicing functional analysis of DNA variants of the BRCA2 gene by hybrid minigenes. *Breast Cancer Res*, **14**, R87.
6. Reese, M.G., Eeckman, F.H., Kulp, D. and Haussler, D. (1997) Improved splice site detection in Genie. *J Comput Biol*, **4**, 311-323.
7. Kumaki, S., Ishii, N., Minegishi, M., Ohashi, Y., Hakozaki, I., Nonoyama, S., Imai, K., Morio, T., Tsuge, I., Sakiyama, Y. et al. (2000) Characterization of the gammac chain among 27 unrelated Japanese patients with X-linked severe combined immunodeficiency (X-SCID). *Hum Genet*, **107**, 406-408.
8. Desmet, F.O., Hamroun, D., Lalande, M., Collod-Beroud, G., Claustres, M. and Beroud, C. (2009) Human Splicing Finder: an online bioinformatics tool to predict splicing signals. *Nucleic Acids Res*, **37**, e67.
9. Niihori, T., Aoki, Y., Narumi, Y., Neri, G., Cave, H., Verloes, A., Okamoto, N., Hennekam, R.C., Gillissen-Kaesbach, G., Wiczorek, D. et al. (2006) Germline KRAS and BRAF mutations in cardio-facio-cutaneous syndrome. *Nat Genet*, **38**, 294-296.
10. Cingolani, P., Platts, A., Wang le, L., Coon, M., Nguyen, T., Wang, L., Land, S.J., Lu, X. and Ruden, D.M. (2012) A program for annotating and predicting the effects of single nucleotide polymorphisms, SnpEff: SNPs in the genome of *Drosophila melanogaster* strain w1118; iso-2; iso-3. *Fly (Austin)*, **6**, 80-92.
11. Finn, R.D., Coghill, P., Eberhardt, R.Y., Eddy, S.R., Mistry, J., Mitchell, A.L., Potter, S.C., Punta, M., Qureshi, M., Sangrador-Vegas, A. et al. (2016) The Pfam protein families database: towards a more sustainable future. *Nucleic Acids Res*, **44**, D279-285.
12. Adzhubei, I.A., Schmidt, S., Peshkin, L., Ramensky, V.E., Gerasimova, A., Bork, P., Kondrashov, A.S. and Sunyaev, S.R. (2010) A method and server for predicting damaging missense mutations. *Nat Methods*, **7**, 248-249.
13. Amorini, M., Romeo, P., Bruno, R., Galletti, F., Di Bella, C., Longo, P., Briuglia, S., Salpietro, C. and Rigoli, L. (2015) Prevalence of Deafness-Associated Connexin-26 (GJB2) and Connexin-30 (GJB6) Pathogenic Alleles in a Large Patient Cohort from Eastern Sicily. *Ann Hum Genet*, **79**, 341-349.
